# Supplementary material for: Oligonucleotides forming an i-motif: the pH-dependent assembly of individual strands and branched structures containing 2′-deoxy-5-propynylcytidine
Source: Royal Society of Chemistry journal article supplement (doi:10.1039/b704583b), 2007-01-01
Supplement: b704583b.pdf [file b704583b.pdf]

## **Supporting Information**

Frank Seela: Laboratorium für Organische und Bioorganische Chemie, Institut für Chemie, Universität Osnabrück, Barbarastr. 7, 49069 Osnabrück, Germany

### **Oligonucleotides Forming an i-Motif: The pH-Dependent Assembly of Individual Strands and Branched Structures Containing 2'-Deoxy-5-propynylcytidine**

**Frank Seela<sup>\*</sup>, Simone Budow and Peter Leonard**

*Laboratory of Bioorganic Chemistry and Chemical Biology, Center for Nanotechnology, Heisenbergstraße 11, 48149 Münster, Germany and Laboratorium für Organische und Bioorganische Chemie, Institut für Chemie, Universität Osnabrück, Barbarastraße 7, 49069 Osnabrück, Germany*

Phone: +49(0)541 969 2791; Mobil Phone: +49-1737250297; Fax: +49(0)251 53406 501

E-mail: [Frank.Seela@uni-osnabrueck.de](mailto:Frank.Seela@uni-osnabrueck.de); [Seela@uni-muenster.de](mailto:Seela@uni-muenster.de)

Homepage: [www.seela.net](http://www.seela.net)

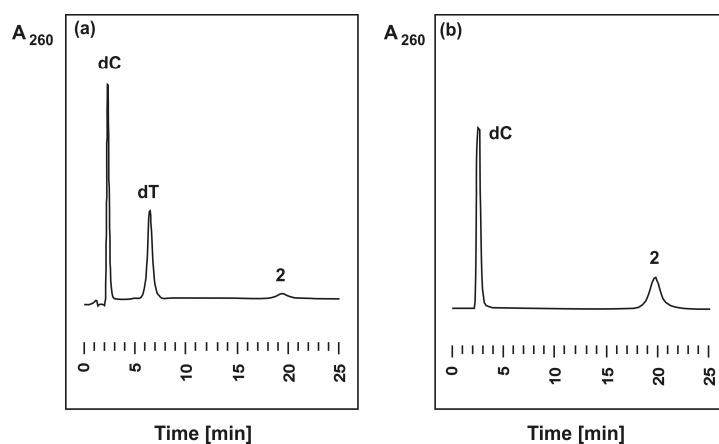

(a) Reverse-phase HPLC profile of the enzymatic analysis of oligonucleotide **10** incorporating **2** by phosphodiesterase (EC 3.1.15.1, *Crotallus adamanteus*) followed by alkaline phosphatase (EC 3.1.3.1, *Escherichia coli*) in 0.1 M Tris-HCl buffer (pH 8.9) at 37°C. (b) 1 : 1 mixture of the nucleosides dC and **2** in water,  $c = 10^{-3}$  M/l. Gradient [A: 0.1 M (Et<sub>3</sub>NH)OAc (pH 7.0)/MeCN 95:5; B: MeCN]: 20 min. A, 40 min. 0-65% B in A; flow rate: 0.7 ml/min. The hydrolysis was monitored at 260 nm. For more details see the experimental part.
